# Supplementary material
Source: PubMed Central journal article supplement (PMC2723181)
Supplement: NIHMS113941-supplement-2.pdf [file NIHMS113941-supplement-2.pdf]

# Supplementary Figure 1

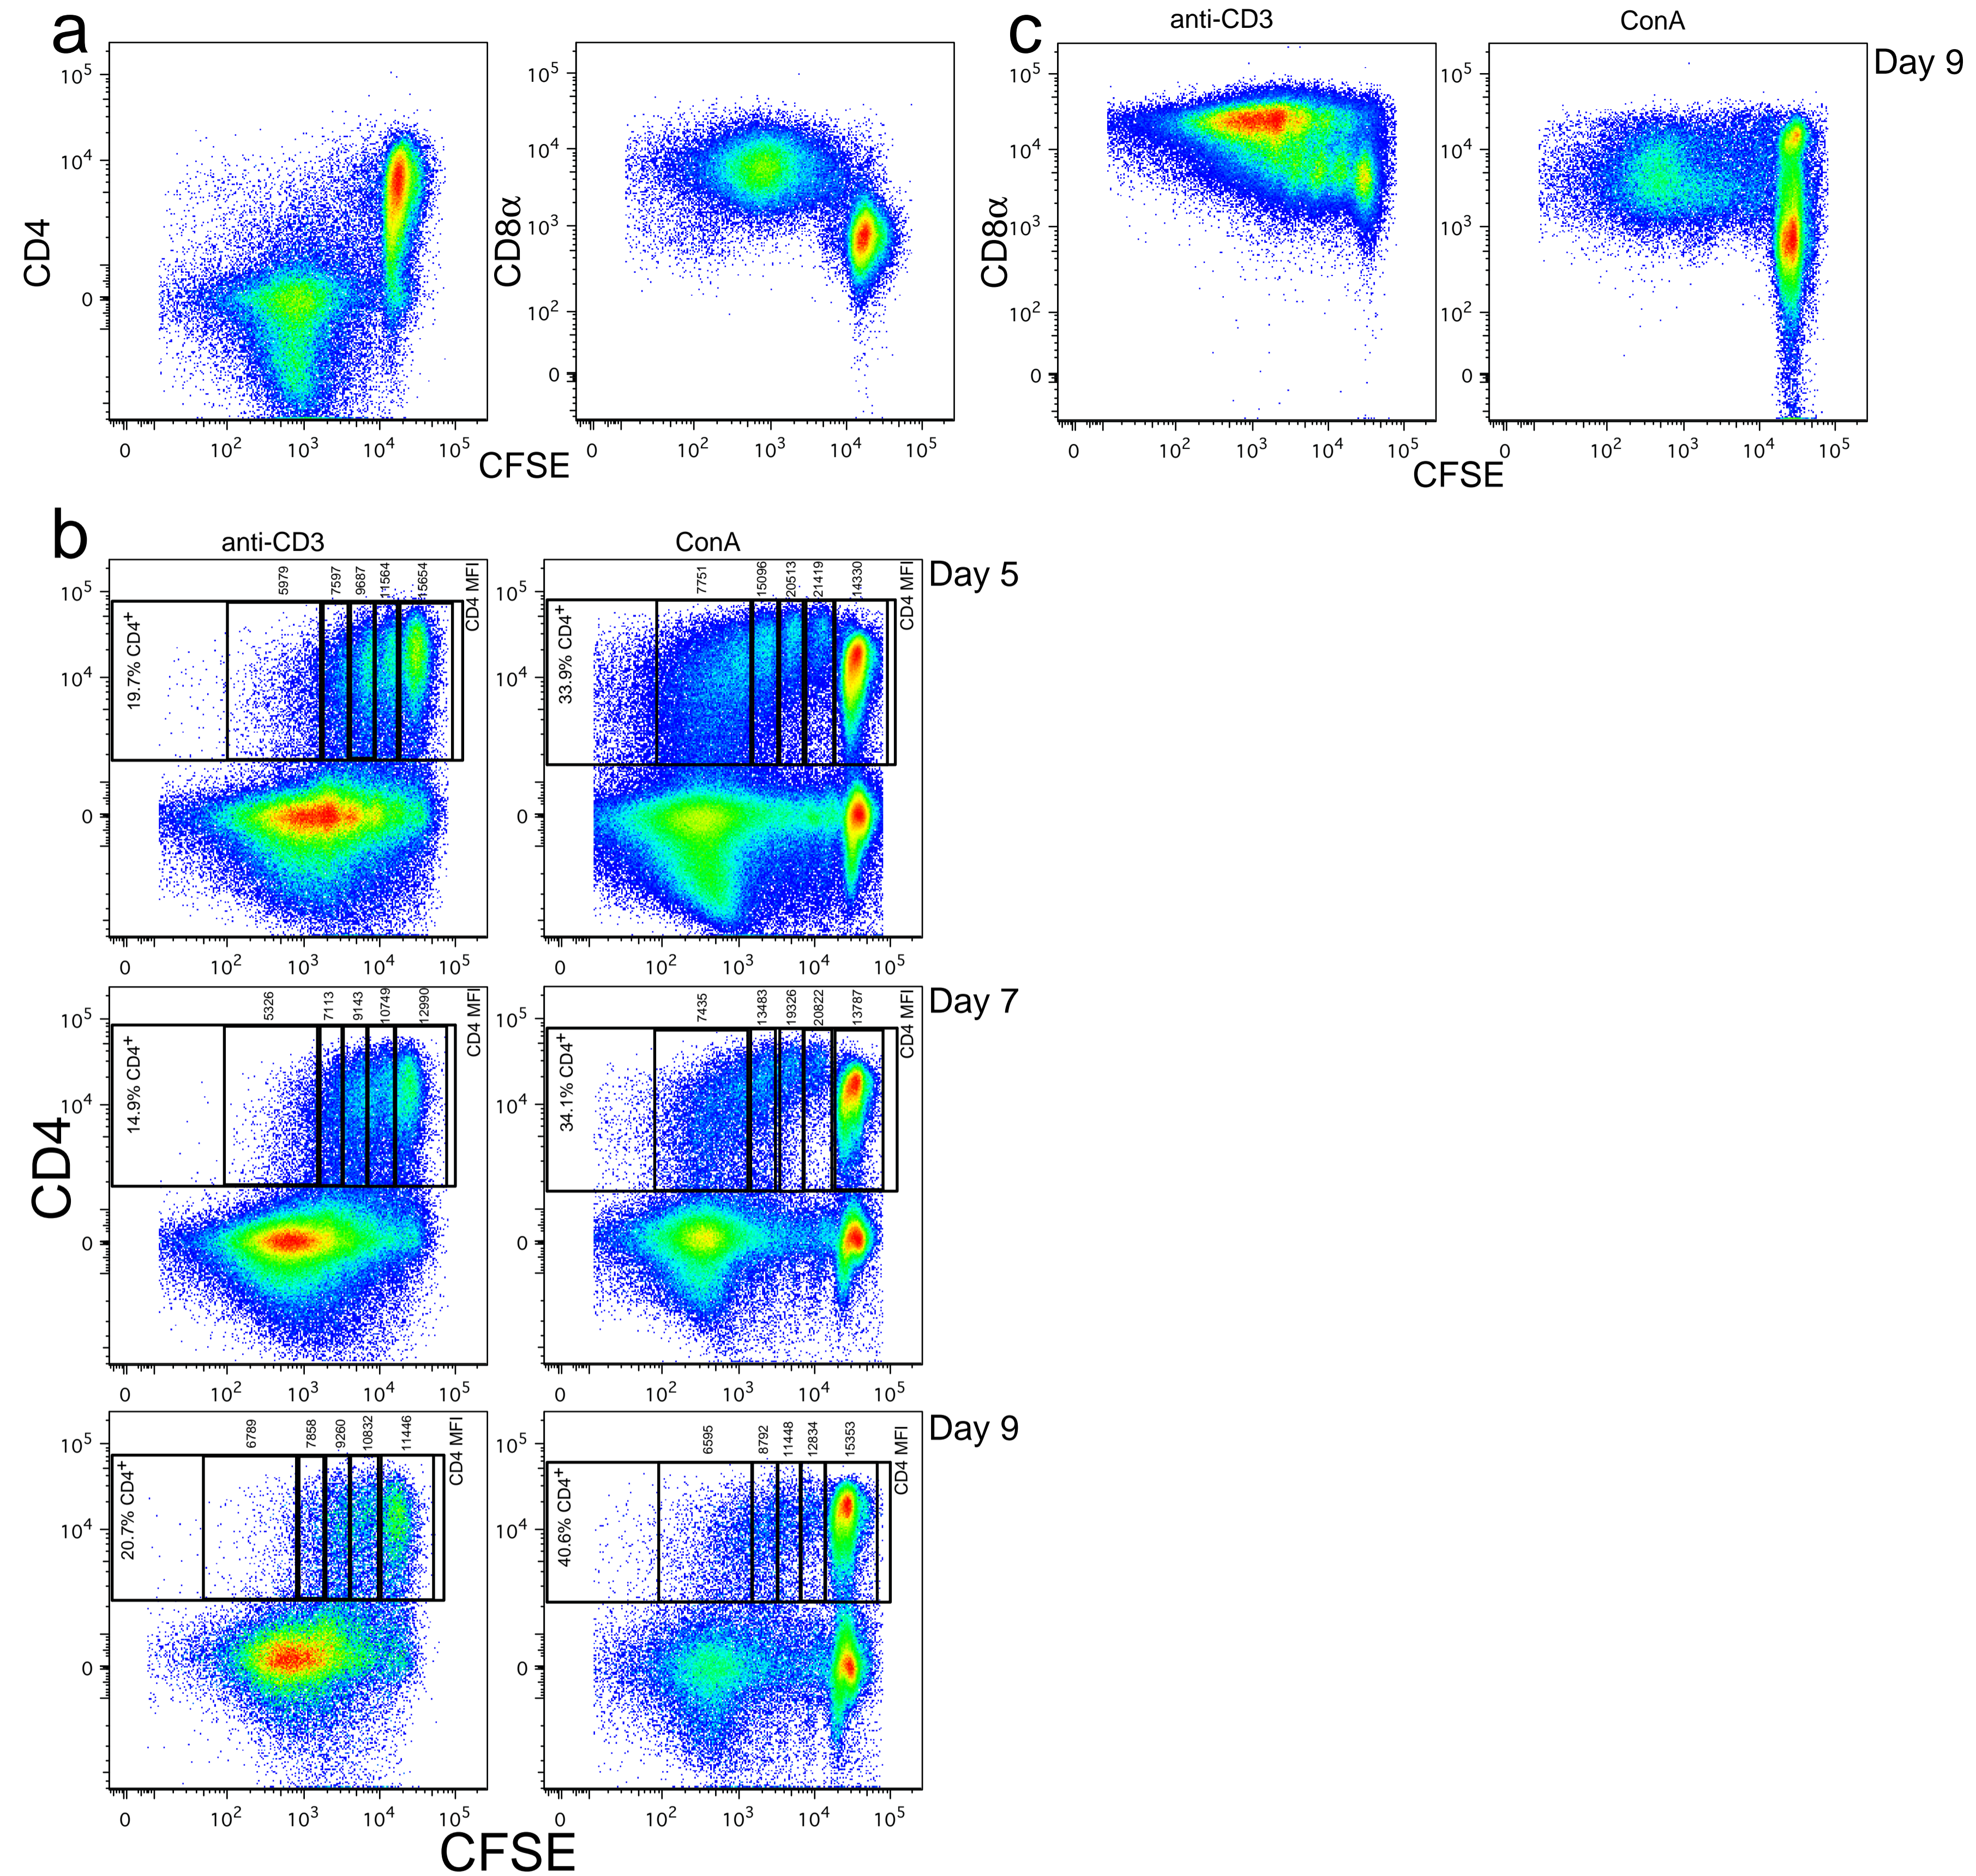

**sFigure 1. CD4<sup>+</sup> T cells down regulate CD4 after in vitro stimulation.** (a) sorted naive CD4 T cells down regulate CD4 and up regulate CD8 $\alpha$  after in vitro stimulation with SEB. (b) CD4 is down regulated after stimulation with either anti-CD3 or ConA 5, 7, and 9 days after stimulation. (c) CD8 $\alpha$  is up regulated after anti-CD3 or ConA stimulation.
