# Supplementary material
Source: PubMed Central journal article supplement (PMC2723181)
Supplement: NIHMS113941-supplement-3.pdf [file NIHMS113941-supplement-3.pdf]

# Supplementary Figure 2

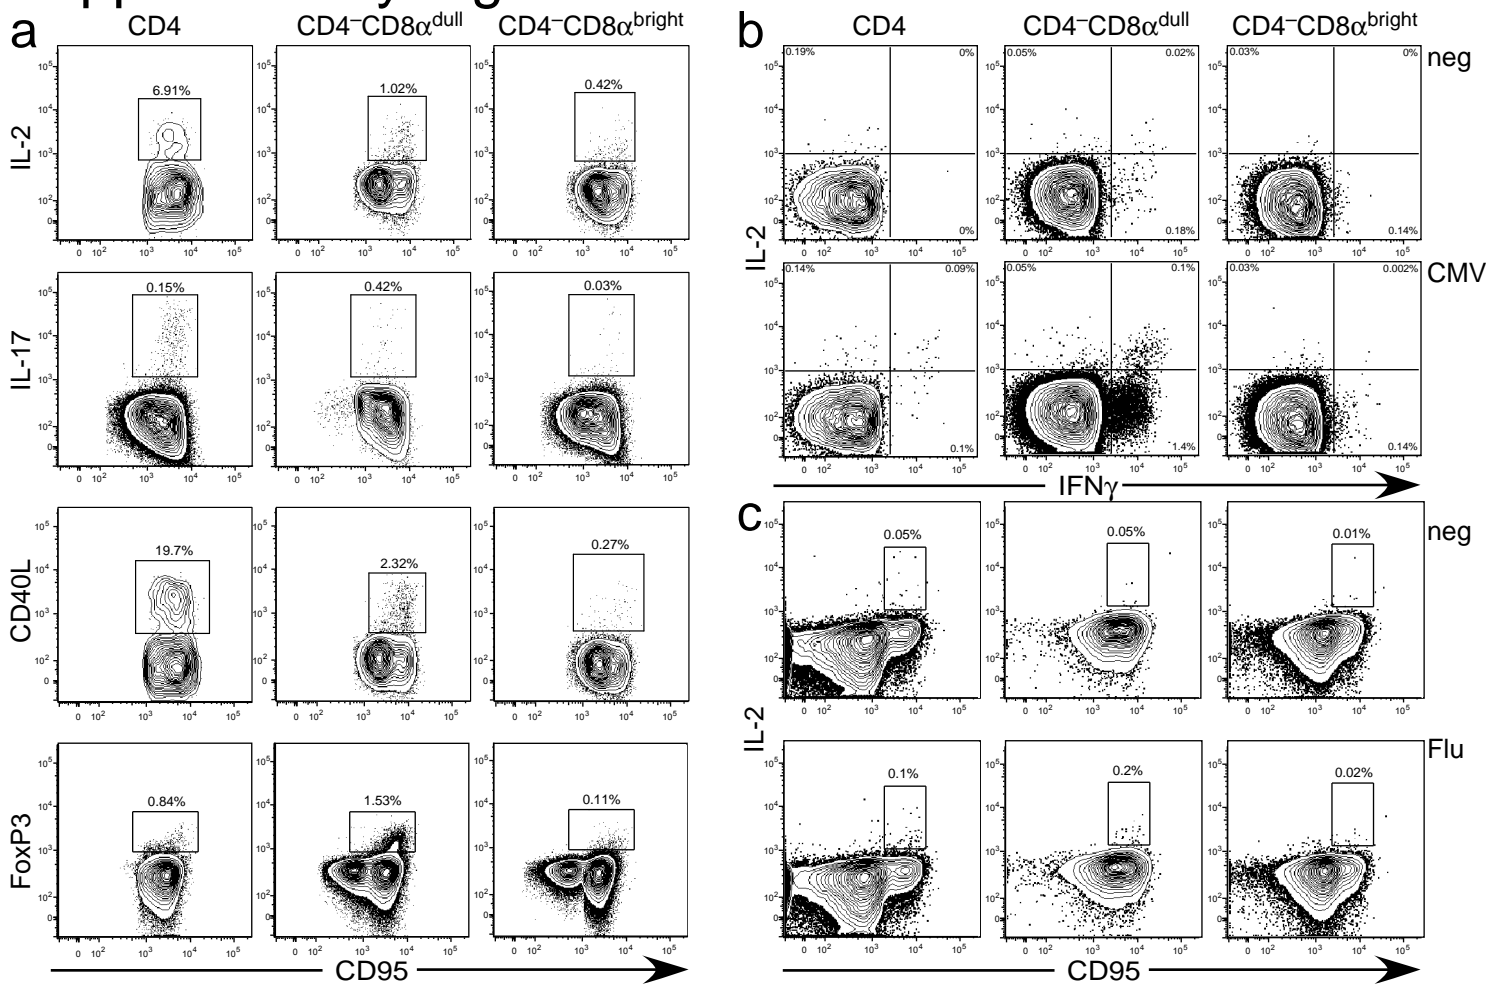

**Figure 2. CD4-CD8 $\alpha^{\text{dull}}$  T cells preserve CD4 $^+$  T cell function.** (a) Representative IL-2, IL-17, CD40L, and FoxP3 expression in memory CD4 $^+$ , CD4-CD8 $\alpha^{\text{dim}}$ , and CD4-CD8 $\alpha^{\text{bright}}$  T cells (b) Frequencies of memory CD4 $^+$ , CD4-CD8 $\alpha^{\text{dim}}$ , and CD4-CD8 $\alpha^{\text{bright}}$  T cells from AG731 producing effector cytokines spontaneously (negative control) or after stimulation with CMV (c) Frequencies of memory CD4 $^+$ , CD4-CD8 $\alpha^{\text{dim}}$ , and CD4-CD8 $\alpha^{\text{bright}}$  T cells from AG25 producing effector cytokines spontaneously (negative control) or after stimulation with influenza.
