# Supplementary material
Source: PubMed Central journal article supplement (PMC2723181)
Supplement: NIHMS113941-supplement-4.pdf [file NIHMS113941-supplement-4.pdf]

# Supplementary Figure 3

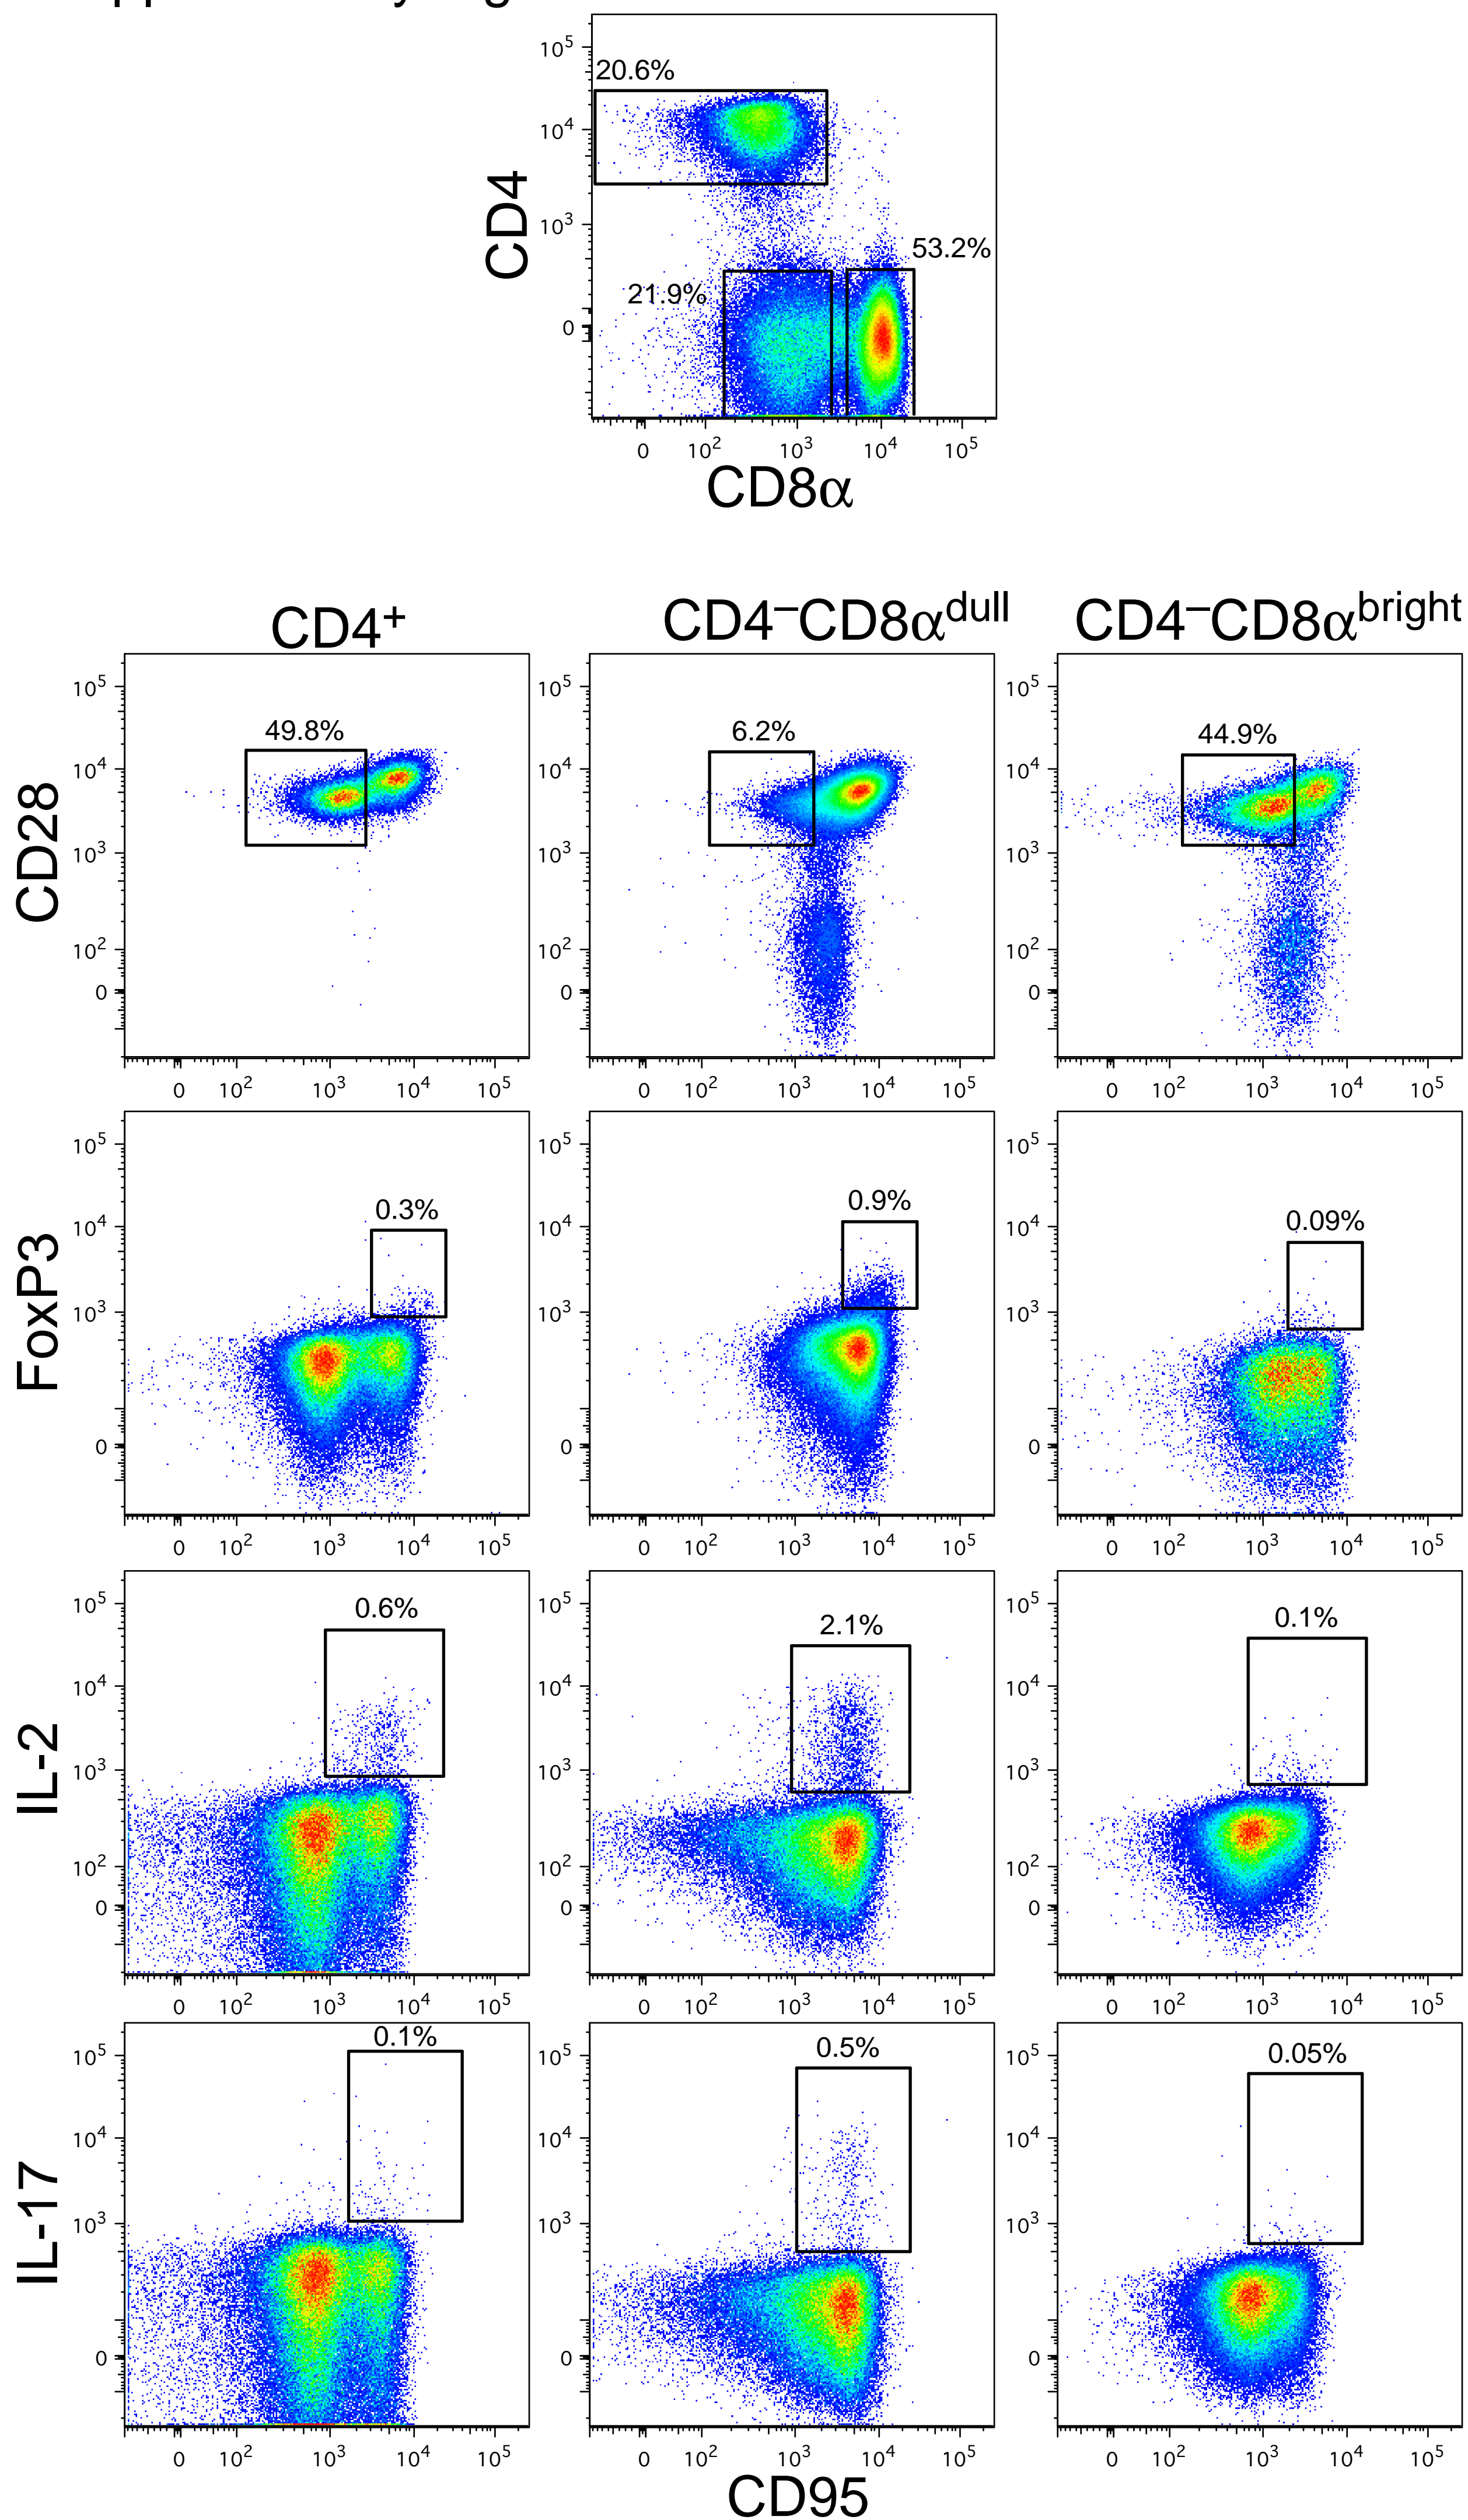

## sFigure 3. Phenotype and function of T cell subsets in sabeus AGM.

(a) Representative CD4 and CD8α expression in sabeus AGM T cells (b) Frequencies of naive, FoxP3<sup>+</sup>, IL2<sup>+</sup>, and IL17<sup>+</sup> cells within the CD4<sup>+</sup>, CD4<sup>-</sup>CD8α<sup>dull</sup>, and CD4<sup>-</sup>CD8α<sup>bright</sup> T cell subsets of sabeus AGM.
